# Supplementary material for: Dysregulation of Translation Factors EIF2S1, EIF5A and EIF6 in Intestinal-Type Adenocarcinoma (ITAC)
Source: MDPI journal article supplement (doi:10.3390/cancers13225649), 2021-11-11
Supplement: s1 [file s1]

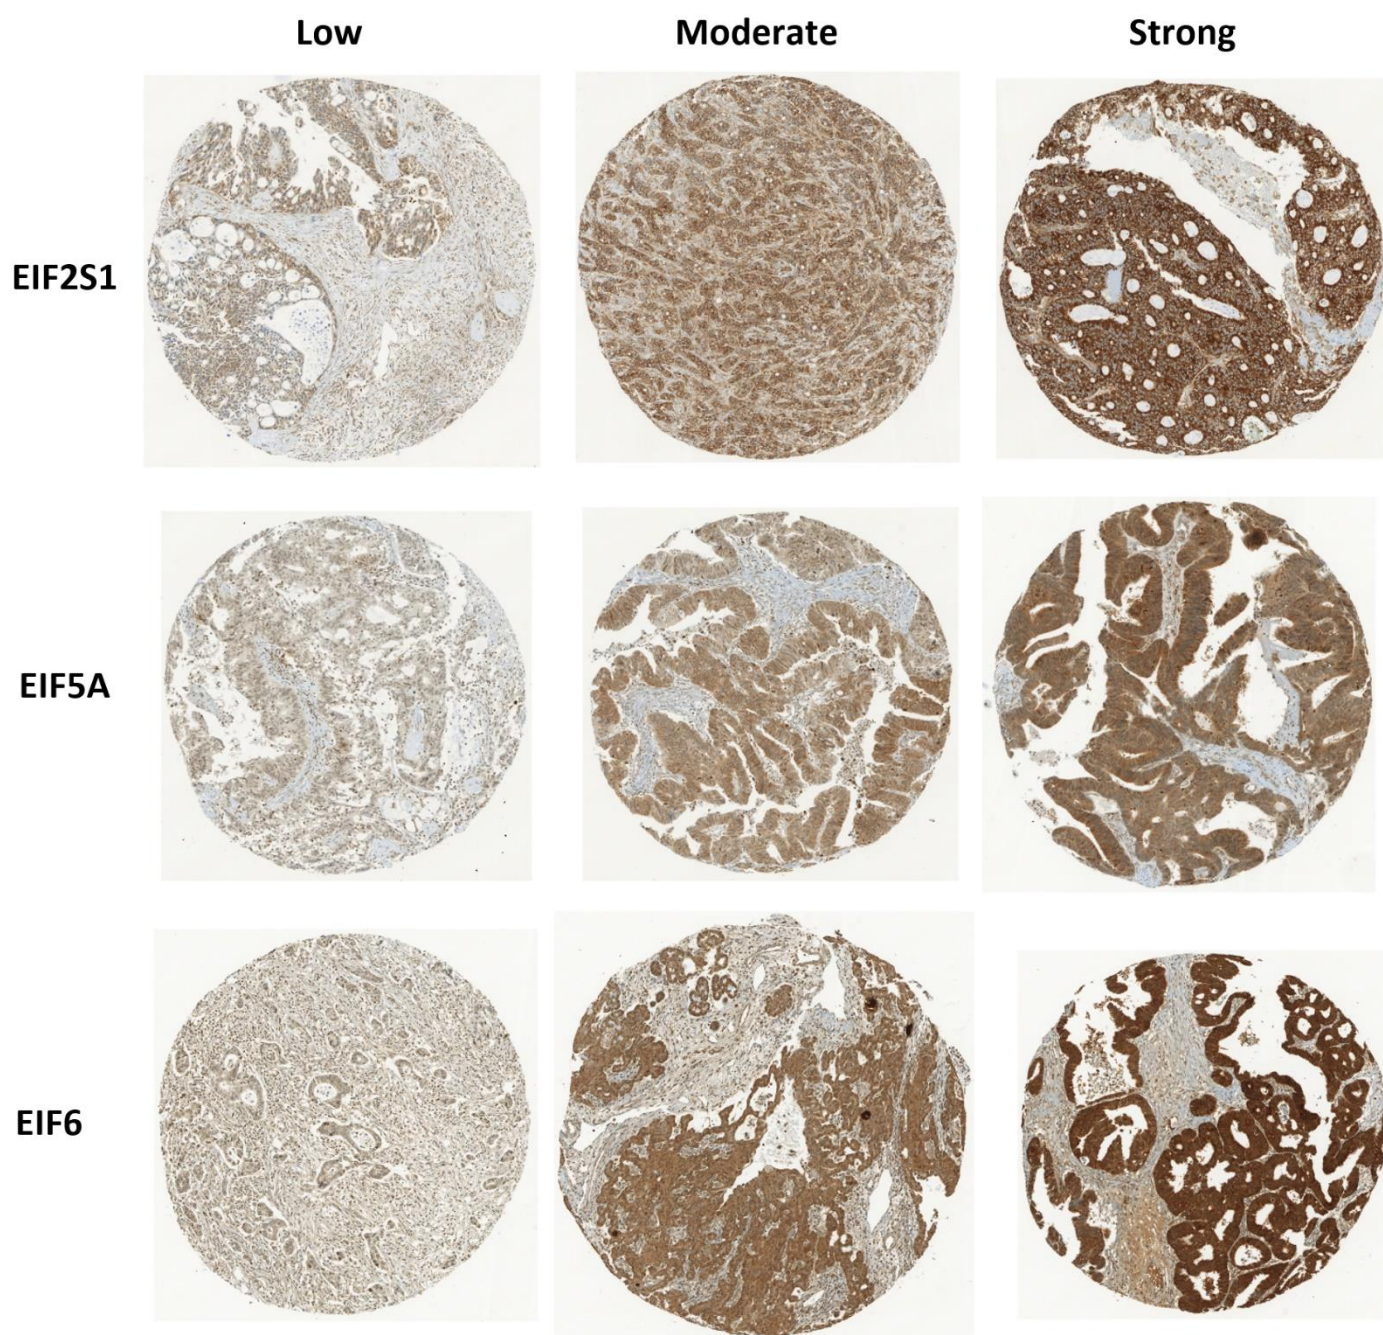

**Figure S1.** Antibody treated Tissue Micro Arrays from Intensity 1 to 3 for EIF2S1, EIF5A and EIF6.

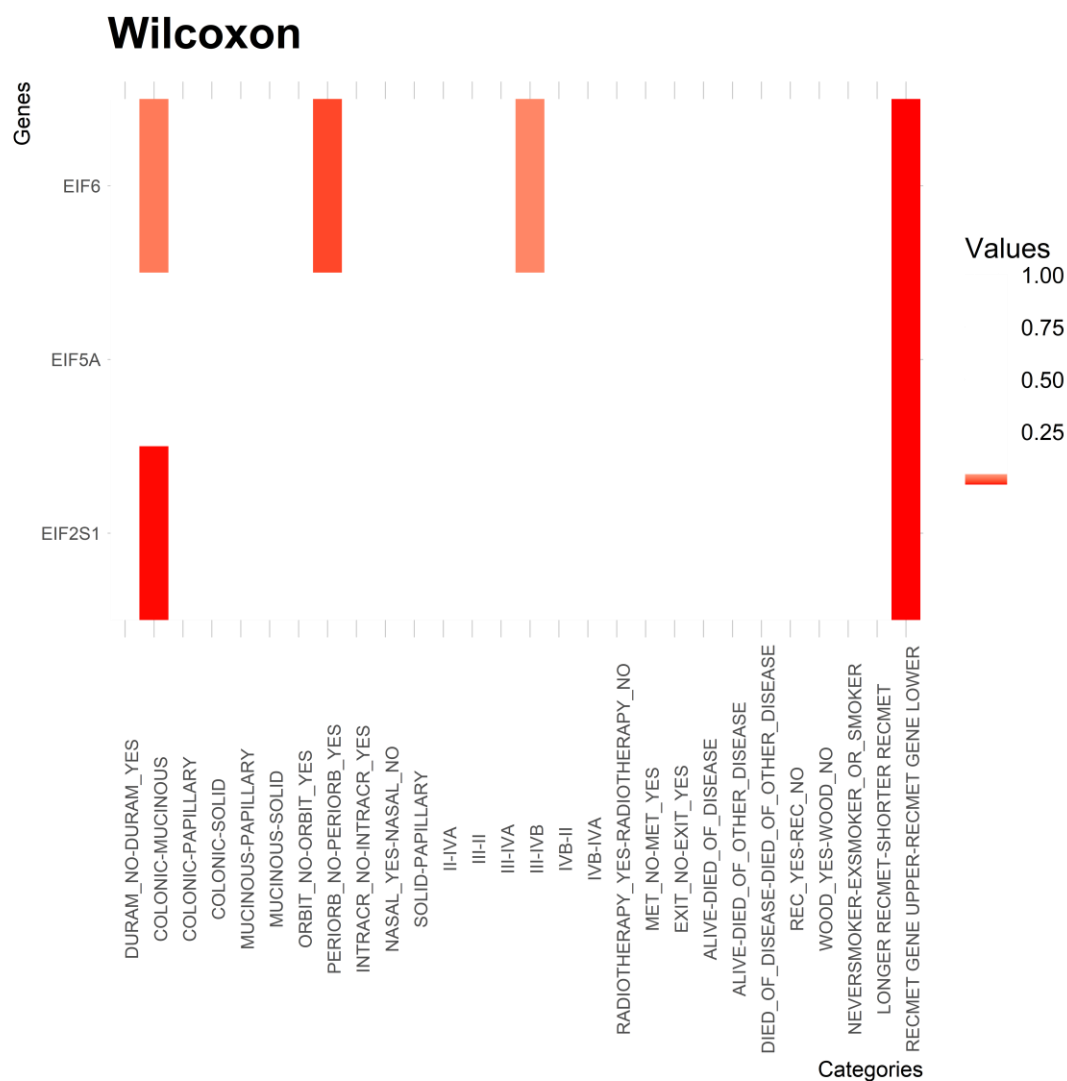

**Figure S2.** Wilcoxon p-values based on the scores for the proteins EIF2S1, EIF5A and EIF6 between the groups. The groups were built based on clinical information.

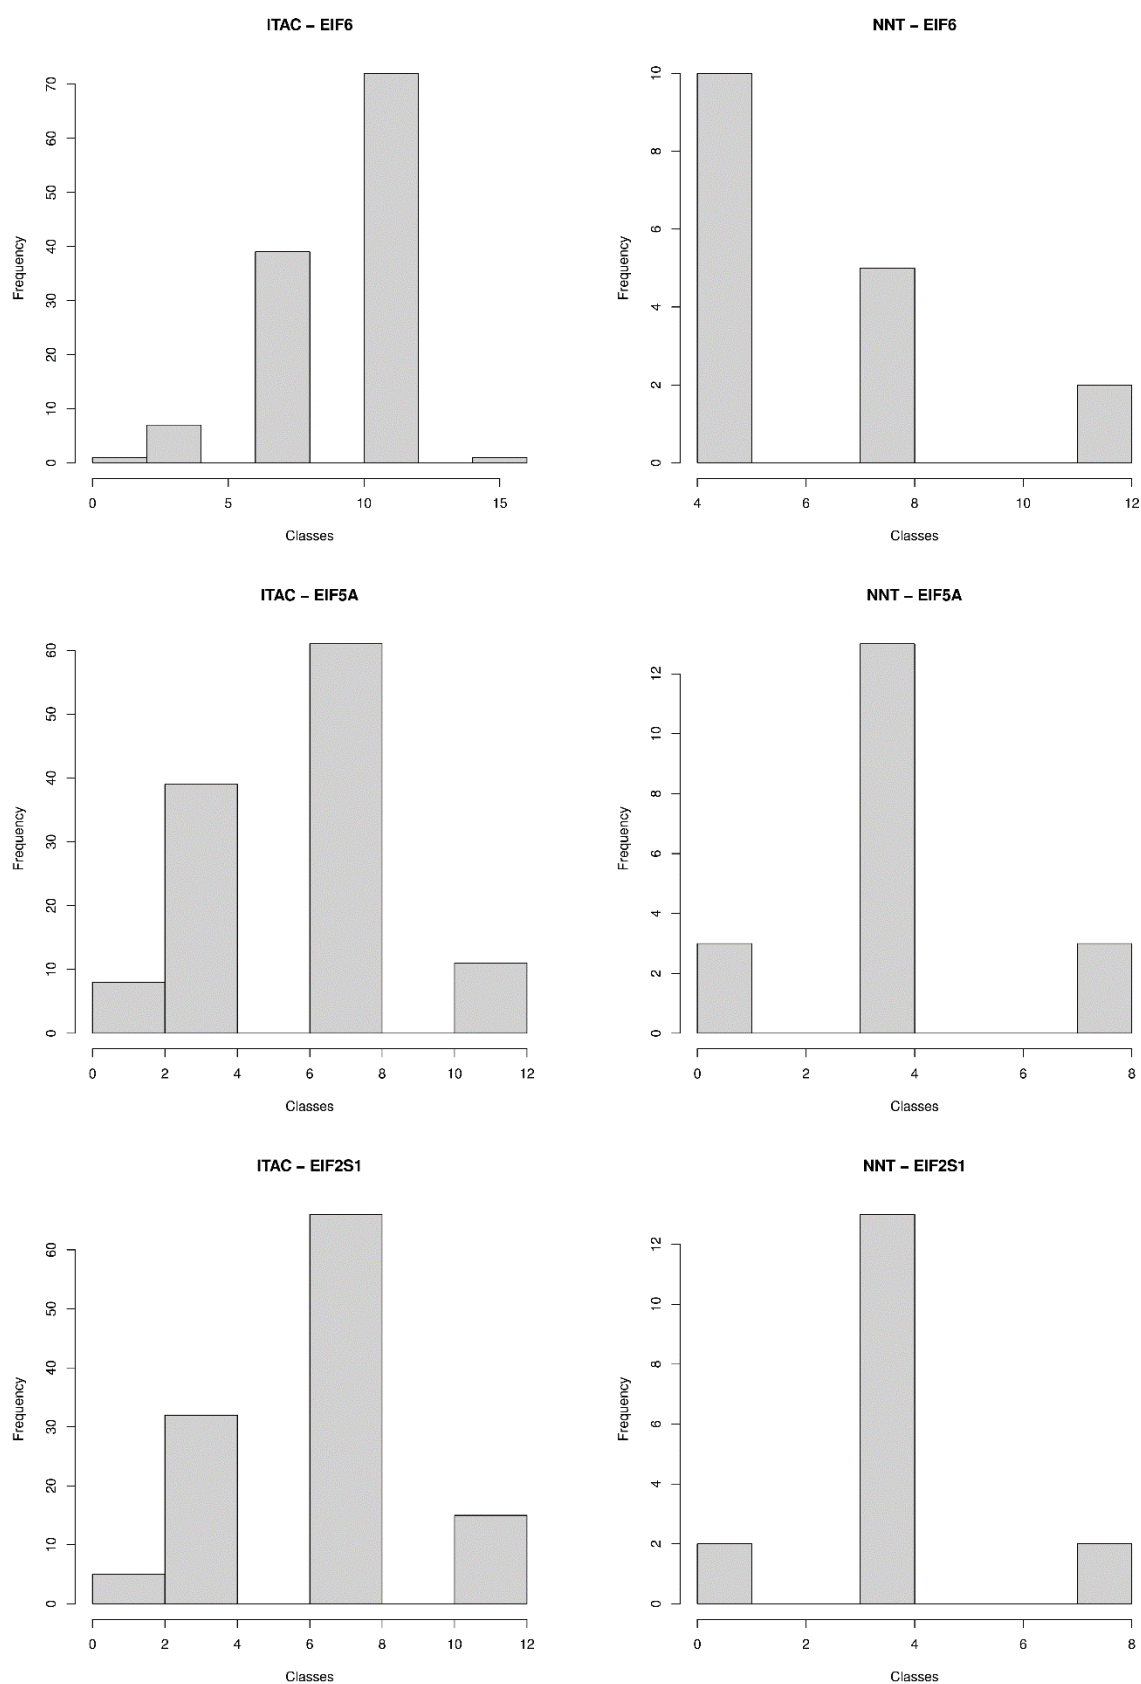

**Figure S3.** Histograms of ITACs respectively NNT and EIF5A, EIF6 and EIF2S1. On the x-axis the score and on the y-axis the frequency are applied.

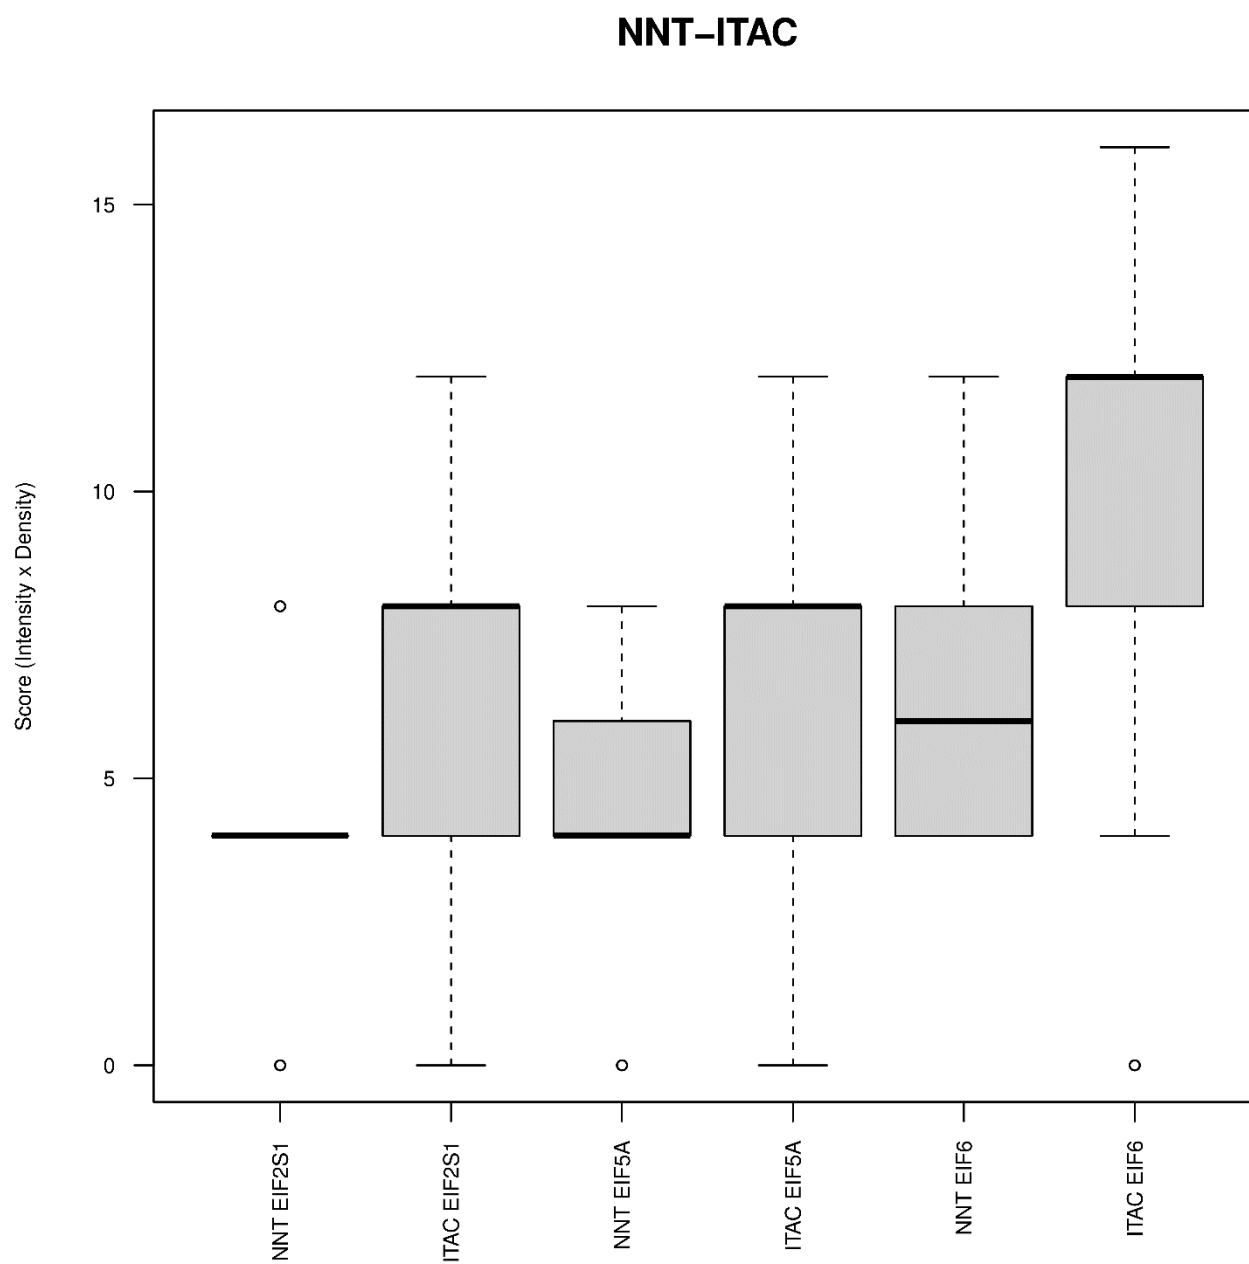

**Figure S4.** Boxplot of ITACs respectively NNT and EIF5A, EIF6 and EIF2S1.

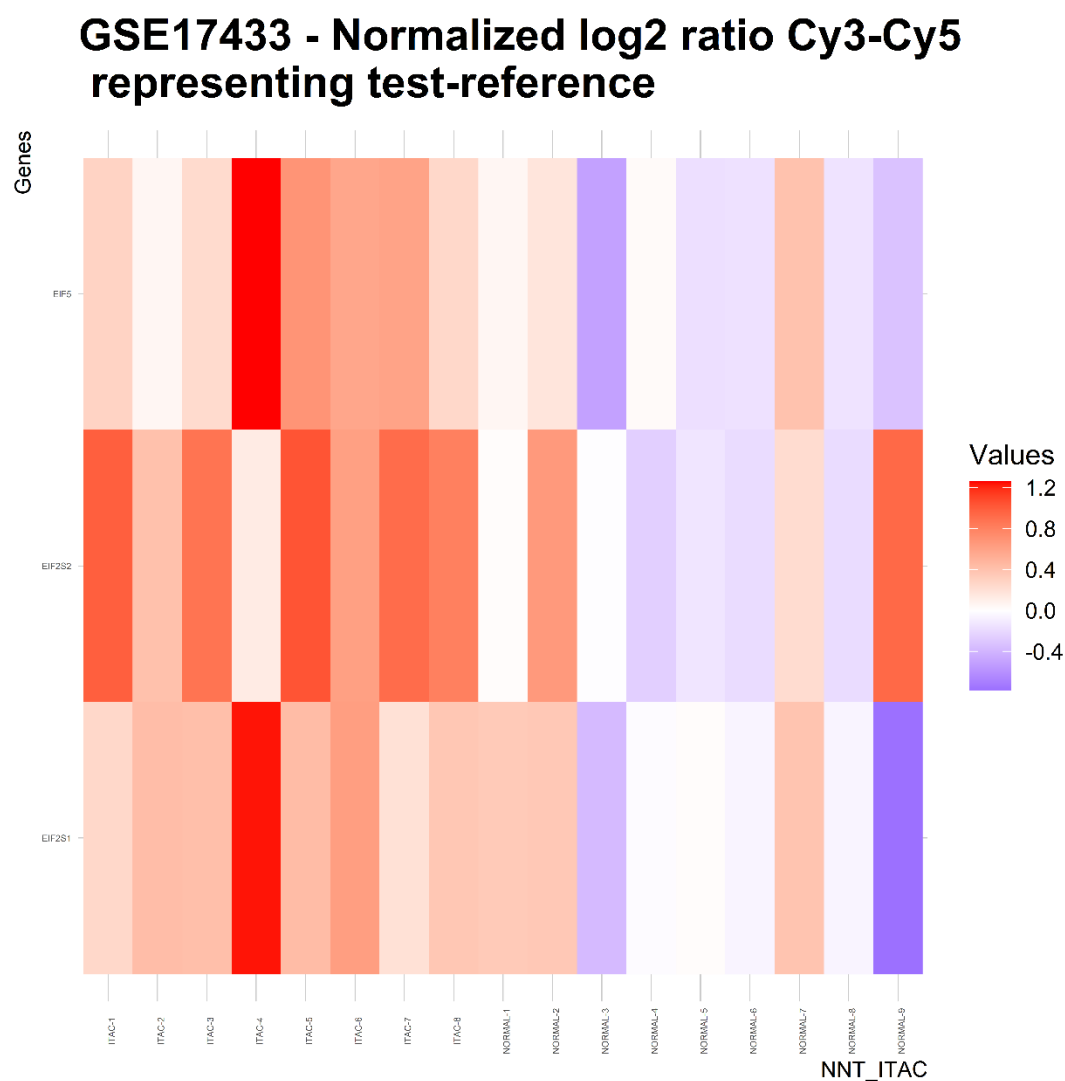

**Figure S5.** Heatmap of EIF5, EIF2S2 and EIF2S1 based on each sample of the GSE17433 dataset.

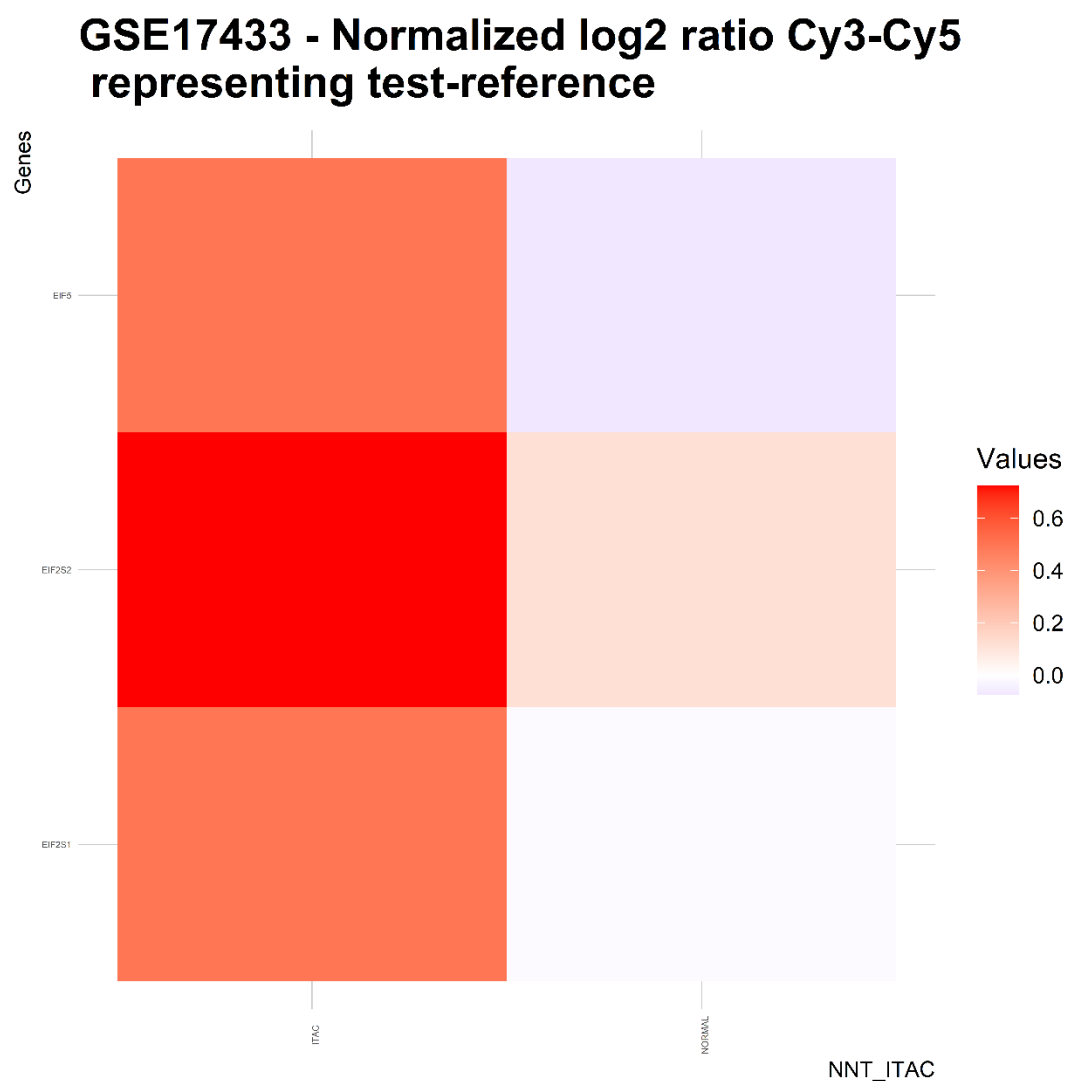

**Figure S6.** Heatmap of EIF5, EIF2S2 and EIF2S1 based on average values of the samples of the GSE17433 dataset.

**Table S1.** Number of samples for NNT and ITAC.

|               | <i>NNT</i> | <i>ITAC</i> |
|---------------|------------|-------------|
| <i>EIF5A</i>  | 8          | 119         |
| <i>EIF6</i>   | 6          | 120         |
| <i>EIF2S1</i> | 8          | 118         |

**Table S2.** Hazard Ratios of comparisons between scores of EIF2S1, EIF5A and EIF6.

| Translation Factor | Score versus | Score | Hazard Ratio |
|--------------------|--------------|-------|--------------|
| EIF2S1             | 8            | 12    | 1.5646       |
| EIF2S1             | 8            | 3     | 1.4047       |
| EIF2S1             | 8            | 4     | 1.3731       |
| EIF2S1             | 3            | 12    | 1.2546       |
| EIF2S1             | 3            | 4     | 1.1823       |
| EIF2S1             | 4            | 12    | 1.0364       |
| EIF2S1             | 12           | 4     | 0.9649       |
| EIF2S1             | 4            | 3     | 0.8458       |
| EIF2S1             | 12           | 3     | 0.7971       |
| EIF2S1             | 4            | 8     | 0.7283       |
| EIF2S1             | 3            | 8     | 0.7119       |
| EIF2S1             | 12           | 8     | 0.6391       |
| EIF5A              | 12           | 8     | 1.7623       |
| EIF5A              | 1            | 8     | 1.7359       |
| EIF5A              | 4            | 8     | 1.5294       |
| EIF5A              | 1            | 12    | 1.3573       |
| EIF5A              | 4            | 12    | 1.1088       |
| EIF5A              | 1            | 4     | 1.0887       |
| EIF5A              | 4            | 1     | 0.9186       |
| EIF5A              | 12           | 4     | 0.9019       |
| EIF5A              | 12           | 1     | 0.7368       |
| EIF5A              | 8            | 4     | 0.6538       |
| EIF5A              | 8            | 1     | 0.5761       |
| EIF5A              | 8            | 12    | 0.5674       |
| EIF6               | 16           | 8     | > 5.0000     |
| EIF6               | 16           | 12    | > 5.0000     |
| EIF6               | 16           | 4     | 3.6026       |
| EIF6               | 4            | 8     | 1.2414       |
| EIF6               | 12           | 4     | 1.1105       |
| EIF6               | 8            | 12    | 1.0622       |
| EIF6               | 12           | 8     | 0.9415       |
| EIF6               | 4            | 12    | 0.9005       |
| EIF6               | 8            | 4     | 0.8056       |
| EIF6               | 4            | 16    | 0.2776       |
| EIF6               | 12           | 16    | 0.0665       |
| EIF6               | 8            | 16    | 0.0385       |

**Table S3.** Hazard Ratios of comparisons between EIF2S1, EIF5A and EIF6 depending on the same score.

| Translation Factor versus | Translation Factor | Score | Hazard Ratio |
|---------------------------|--------------------|-------|--------------|
| EIF5A                     | EIF2S1             | 12    | 2.0671       |
| EIF5A                     | EIF2S1             | 4     | 1.5873       |
| EIF5A                     | EIF6               | 12    | 1.4604       |
| EIF2S1                    | EIF5A              | 8     | 1.3509       |
| EIF6                      | EIF2S1             | 12    | 1.3085       |
| EIF6                      | EIF2S1             | 4     | 1.3077       |
| EIF5A                     | EIF6               | 4     | 1.2156       |
| EIF6                      | EIF5A              | 8     | 1.2145       |
| EIF2S1                    | EIF6               | 8     | 1.0953       |
| EIF6                      | EIF2S1             | 8     | 0.9130       |
| EIF5A                     | EIF6               | 8     | 0.8234       |
| EIF6                      | EIF5A              | 4     | 0.8226       |
| EIF2S1                    | EIF6               | 4     | 0.7647       |
| EIF2S1                    | EIF6               | 12    | 0.7642       |
| EIF5A                     | EIF2S1             | 8     | 0.7403       |
| EIF6                      | EIF5A              | 12    | 0.6848       |
| EIF2S1                    | EIF5A              | 4     | 0.6300       |
| EIF2S1                    | EIF5A              | 12    | 0.4838       |
